# Supplementary material for: Ethnobotanical Survey of Medicinal Herbs in the Western Region in Syria (Latakia and Tartus)
Source: Research Square preprint supplement (doi:10.21203/rs.3.rs-355008/v1), 2021-03-31
Supplement: Supplementary file 1 [file f456025cf37759c2bfe179cf.docx]

**Appendix A. Questionnaire card**

**Questionnaire A**

| **Date** | **District** | **Age** | **Sex** |
| --- | --- | --- | --- |
| ............ | .............. | ............ | ............ |
|

**Questionnaire B**

|  | | **Botanical name** | | **Scientific name** | | | **Names** | | |
| --- | --- | --- | --- | --- | --- | --- | --- | --- | --- |
| **………………** | | **………………………….** | | | **……………** | | |
| **Mode of preparation** | Decoction | Infusion | Fumigation | Maceration | Powder | Cream | Bath | Plaster | Other |
| …….. | ……. | ………. | ………. | …….. | ……… | ….... | ……. | …. |
| **Part used** | Root | Leaf | Seed | Fruit | Bulb | Rhizome | Flower | Whole plant | Other |
| …….. | …… | …… | …… | …… | ……. | …… | ……. | ……. |
| **Plant Type** | | ………………………………………………………………… | | | | | | | |
| **Ethnobotanical Uses** | | ………………………………………………………………… | | | | | | | |
| **Administration mode** | | ………………………………………………………………… | | | | | | | |
| **Treatment duration** | | ………………………………………………………………… | | | | | | | |
| **Dosage** | | ………………………………………………………………… | | | | | | | |
